# Supplementary material for: Serving Two Masters: Effect of Escherichia coli Dual Resistance on Antibiotic Susceptibility
Source: MDPI journal article supplement (doi:10.3390/antibiotics12030603), 2023-03-17
Supplement: s1 [file s1]

## Supplementary Data

**Figure S1. Resistance of populations to bacteriophage T7.** Representative plates showing plaques of (a) iron (III)/phage resistant (b) Phage resistant (c) Ancestor (d) Control and (e) Iron (III) resistant populations. Significantly higher number of plaques were observed on the ancestral population, followed by the control and iron (III)-resistant populations. Bacteriophage T7 plaques are between 1-2mm in diameter at formation (after 2½ - 3 hours of incubation at 37°C). Plaques can expand to 4-6mm in diameter afterwards. Pictures were taken after 12 hours of incubation.

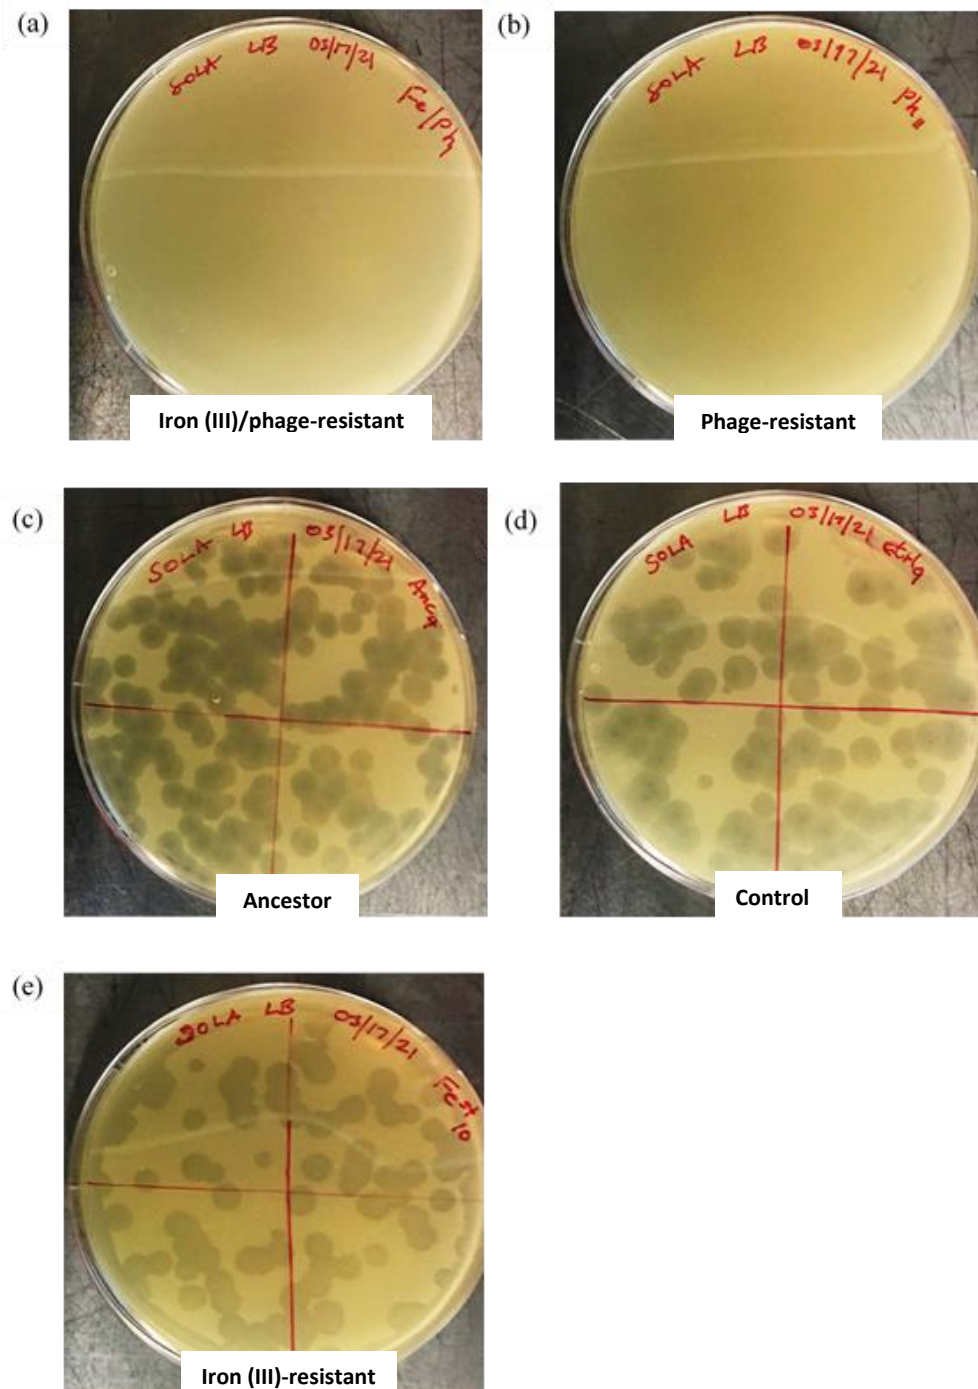

**Figure S2. Dual resistance of populations to bacteriophage T7 and iron (III).** Representative plates showing bacterial colonies of (a) Iron (III)/phage resistant (b) Control (c) Iron (III) resistant (d) Ancestor and (e) Phage resistant populations. Significantly higher number of resistant bacterial colonies were observed on the ancestral population, followed by the control and iron (III)-resistant populations.

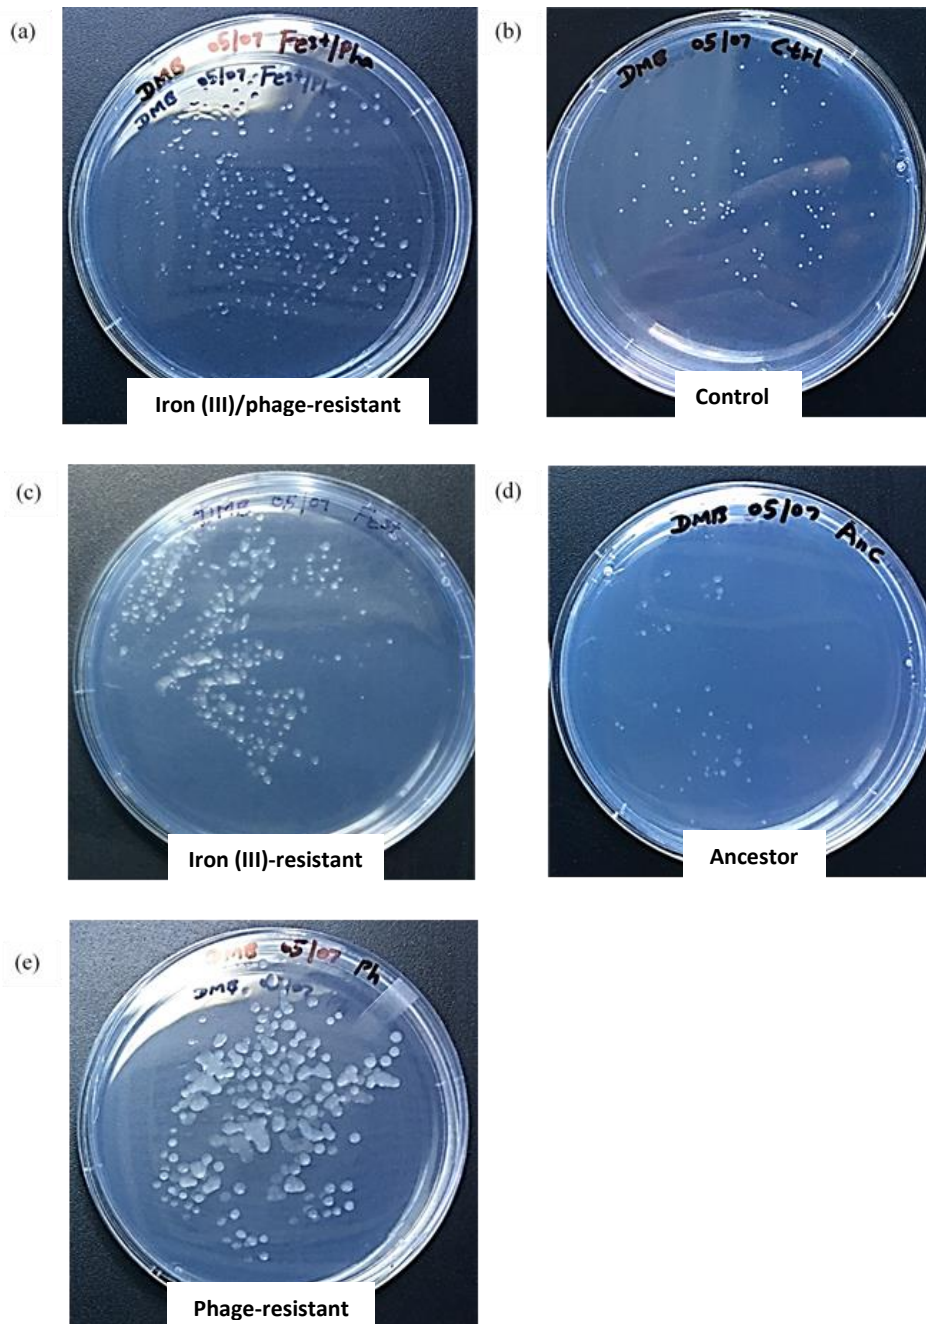

**Table S1. Multiple comparisons of resistance of populations to lytic phage in a plaque assay.** \*The mean difference is significant at the 0.05 level

| (I) Populations  | (J) Populations  | Mean difference (I-J) | Significance |
|------------------|------------------|-----------------------|--------------|
| Control          | Iron (III)/phage | 147.17*               | <0.001       |
|                  | Iron (III)       | 64.33*                | <0.001       |
|                  | Phage            | 147.17*               | <0.001       |
|                  | Ancestor         | -50.17*               | <0.001       |
| Iron (III)/phage | Control          | -147.17*              | <0.001       |
|                  | Iron (III)       | -82.83*               | <0.001       |
|                  | Phage            | 0.00                  | 1.000        |
|                  | Ancestor         | -197.33*              | <0.001       |
| Iron (III)       | Control          | -64.33*               | <0.001       |
|                  | Iron (III)/phage | 82.83*                | <0.001       |
|                  | Phage            | 82.83*                | <0.001       |
|                  | Ancestor         | -114.50*              | <0.001       |
| Phage            | Control          | -147.17*              | <0.001       |
|                  | Iron (III)/phage | 0.00                  | 1.000        |
|                  | Iron (III)       | -82.83*               | <0.001       |
|                  | Ancestor         | -197.33*              | <0.001       |
| Ancestor         | Control          | 50.17*                | <0.001       |
|                  | Iron (III)/phage | 197.33*               | <0.001       |
|                  | Iron (III)       | 114.50*               | <0.001       |
|                  | Phage            | 197.33*               | <0.001       |

**Table S2. Multiple comparisons of dual resistant populations to lytic phage and iron (III) populations.**

\*The mean difference is significant at the 0.05 level

| (I) Populations  | (J) Populations  | Mean difference (I-J) | Significance |
|------------------|------------------|-----------------------|--------------|
| Ancestor         | Control          | -13.20                | 0.870        |
|                  | Iron (III)       | -60.00*               | 0.001        |
|                  | Iron (III)/Phage | -96.70*               | 0.000        |
|                  | Phage            | -75.30*               | 0.000        |
| Control          | Ancestor         | 13.20                 | 0.870        |
|                  | Iron (III)       | -46.80*               | 0.001        |
|                  | Iron (III)/Phage | -83.50*               | 0.000        |
|                  | Phage            | -62.10*               | 0.000        |
| Iron (III)       | Ancestor         | 60.00*                | 0.001        |
|                  | Control          | 46.80*                | 0.011        |
|                  | Iron (III)/Phage | -36.70                | 0.074        |
|                  | Phage            | -15.30                | 0.797        |
| Iron (III)/phage | Ancestor         | 96.70*                | 0.000        |
|                  | Control          | 83.50*                | 0.000        |
|                  | Iron (III)       | 36.70                 | 0.074        |
|                  | Phage            | 21.40                 | 0.530        |
| Phage            | Ancestor         | 75.30*                | 0.000        |
|                  | Control          | 62.10*                | 0.000        |
|                  | Iron (III)       | 15.30                 | 0.797        |
|                  | Iron (III)/Phage | -21.40                | 0.530        |

**Table S3. (a) Position of minor polymorphisms (blue) in iron (III)/phage-resistant populations at day 35. (b) Annotation of genes mutated (blue- missense mutation; red- nucleotides changed) in iron (III)/phage-resistant populations at day 35.**

**(a)**

| Gene                          | Position  | Mutation                 | FPh1  | FPh4  | FPh5  | FPh6  |
|-------------------------------|-----------|--------------------------|-------|-------|-------|-------|
| <i>dapB</i> → / → <i>carA</i> | 29,330    | C→T                      | 0.000 | 0.101 | 0.000 | 0.000 |
| <i>clpX</i> → / → <i>lon</i>  | 458,790   | IS186 (+) +6 bp :: Δ1 bp | 0.000 | 0.283 | 0.000 | 0.252 |
| <i>ybfL</i> →                 | 737,627   | C→A                      | 0.000 | 0.079 | 0.100 | 0.000 |
| <i>tolA</i> →                 | 777,124   | T→A                      | 0.000 | 0.211 | 0.000 | 0.149 |
| <i>ycdU</i> → / ← <i>serX</i> | 1,097,158 | C→T                      | 0.000 | 0.000 | 0.000 | 0.115 |
| <i>racC</i> ←                 | 1,417,590 | G→T                      | 0.162 | 0.000 | 0.000 | 0.000 |
| <i>fliR</i> → / → <i>rcaA</i> | 2,023,823 | C→T                      | 0.000 | 0.321 | 0.000 | 0.268 |
| <i>rseX</i> → / → <i>yedS</i> | 2,033,742 | G→T                      | 0.000 | 0.000 | 0.135 | 0.000 |
| <i>wcaC</i> ←                 | 2,131,514 | T→C                      | 0.000 | 0.000 | 0.000 | 0.112 |
| <i>asmA</i> ←                 | 2,140,214 | G→A                      | 0.000 | 0.000 | 0.115 | 0.000 |
| <i>asmA</i> ←                 | 2,140,883 | G→A                      | 0.000 | 0.214 | 0.188 | 0.245 |
| <i>yejM</i> →                 | 2,286,084 | T→G                      | 0.122 | 0.000 | 0.000 | 0.000 |
| <i>rcaC</i> ←                 | 2,317,381 | A→C                      | 0.111 | 0.000 | 0.000 | 0.000 |
| <i>ygcW</i> ←                 | 2,900,146 | G→T                      | 0.000 | 0.000 | 0.133 | 0.000 |
| <i>gcvT</i> ← / ← <i>ubiI</i> | 3,050,867 | G→A                      | 0.000 | 0.000 | 0.140 | 0.000 |
| <i>gcvT</i> ← / ← <i>ubiI</i> | 3,050,938 | C→A                      | 0.000 | 0.100 | 0.000 | 0.000 |
| <i>gcvT</i> ← / ← <i>ubiI</i> | 3,050,951 | T→A                      | 0.000 | 0.000 | 0.133 | 0.000 |
| <i>rrsD</i> ← / → <i>yrda</i> | 3,429,162 | G→T                      | 0.000 | 0.000 | 0.108 | 0.079 |
| <i>waaC</i> →                 | 3,796,802 | IS3 (-) +4 bp :: +TC     | 0.000 | 0.187 | 0.000 | 0.180 |
| <i>waaS</i> ←                 | 3,805,057 | C→T                      | 0.000 | 0.101 | 0.013 | 0.000 |
| <i>waaP</i> ←                 | 3,805,170 | G→T                      | 0.000 | 0.093 | 0.119 | 0.000 |
| <i>sbp</i> → / → <i>cdh</i>   | 4,109,912 | A→G                      | 0.000 | 0.000 | 0.105 | 0.000 |
| <i>rpoB</i> →                 | 4,182,820 | C→T                      | 0.000 | 0.268 | 0.000 | 0.199 |
| <i>rpoC</i> →                 | 4,187,356 | +TCT                     | 0.000 | 0.165 | 0.000 | 0.220 |
| <i>malE</i> ← / → <i>malK</i> | 4,246,678 | A→C                      | 0.000 | 0.000 | 0.102 | 0.000 |
| <i>adiY</i> ← / ← <i>adiA</i> | 4,338,025 | C→A                      | 0.000 | 0.000 | 0.000 | 0.100 |
| <i>adiY</i> ← / ← <i>adiA</i> | 4,338,081 | C→A                      | 0.000 | 0.000 | 0.110 | 0.000 |
| <i>adiY</i> ← / ← <i>adiA</i> | 4,338,093 | C→A                      | 0.000 | 0.000 | 0.000 | 0.113 |
| <i>adiY</i> ← / ← <i>adiA</i> | 4,338,109 | C→A                      | 0.000 | 0.188 | 0.201 | 0.201 |
| <i>rnr</i> →                  | 4,408,897 | T→A                      | 0.000 | 0.113 | 0.000 | 0.000 |
| <i>lptF</i> →                 | 4,486,776 | Δ3 bp                    | 0.000 | 0.000 | 0.113 | 0.000 |

**(b)**

| Gene                            | Annotation                 |
|---------------------------------|----------------------------|
| <i>clpX</i> → / → <i>lon</i>    | intergenic (+90/-93)       |
| <i>clpX</i> → / → <i>lon</i>    | intergenic (+90/-93)       |
| <i>uxaB</i> ← / ← <i>yneF</i>   | intergenic (-127/+100)     |
| <i>yeaG</i> →                   | E414K (GAA→AAA)            |
| <i>proQ</i> ←                   | coding (57/699 nt)         |
| <i>fliR</i> → / → <i>rscA</i>   | intergenic (+146/-144)     |
| [ <i>gatR</i> ]-[ <i>fbaB</i> ] | IS3-mediated               |
| <i>yejM</i> →                   | Q356* (CAG→TAG)            |
| <i>yejM</i> →                   | S363* (TCG→TAG)            |
| <i>yejM</i> →                   | coding (1439-1448/1761 nt) |
| <i>rscC</i> ←                   | coding (81-85/2850 nt)     |
| <i>ypjF</i> → / ← <i>ypjA</i>   | intergenic (+200/+164)     |
| <i>rpoS</i> ←                   | G126V (GGG→GTG)            |
| <i>rpoS</i> ←                   | L125Q (CTG→CAG)            |
| <i>rpoS</i> ←                   | E42* (GAA→TAA)             |
| <i>rpoS</i> ←                   | coding (230/993 nt)        |
| <i>waaC</i> →                   | coding (41/960 nt)         |
| <i>waaC</i> →                   | coding (189-191/960 nt)    |
| <i>rpoB</i> →                   | G1189V (GGT→GTT)           |
| <i>rpoC</i> →                   | K395E (AAA→GAA)            |
| <i>rpoC</i> →                   | M725L (ATG→CTG)            |
| <i>pgi</i> → / → <i>yjbE</i>    | intergenic (+275/-224)     |
| <i>yjbH</i> →                   | Y102S (TAT→TCT)            |
| <i>yjbH</i> →                   | W147* (TGG→TAG)            |
| <i>yjbH</i> →                   | coding (1810-1814/2097 nt) |
| <i>adiY</i> ← / ← <i>adiA</i>   | intergenic (-180/+145)     |
| <i>hfq</i> →                    | P64L (CCG→CTG)             |

Stop codons are symbolized as \*

**Table S4. (a) Position of minor polymorphisms (blue) in iron (III)-resistant populations at day 35. (b) Annotation of genes mutated (blue- missense mutation; red- nucleotides changed) in iron (III)-resistant populations at day 35.**

**(a)**

| Gene                          | Position  | Mutation      | Fe1   | Fe2   | Fe5   | Fe7   |
|-------------------------------|-----------|---------------|-------|-------|-------|-------|
| <i>rpoB</i> →                 | 4,183,154 | G→C           | 0.000 | 0.000 | 0.283 | 0.000 |
| <i>dctA</i> ← / ← <i>yhjK</i> | 3,683,472 | G→A           | 0.210 | 0.000 | 0.000 | 0.000 |
| <i>rpoB</i> →                 | 4,183,379 | C→T           | 0.000 | 0.000 | 0.000 | 0.112 |
| <i>rpoB</i> →                 | 4,182,809 | C→A           | 0.165 | 0.000 | 0.000 | 0.000 |
| <i>yeaH</i> →                 | 1,869,484 | G→C           | 0.000 | 0.183 | 0.000 | 0.000 |
| <i>yeaH</i> →                 | 1,869,699 | G→T           | 0.000 | 0.000 | 0.179 | 0.000 |
| <i>cspC</i> ←                 | 1,907,307 | IS2 (–) +5 bp | 0.117 | 0.000 | 0.000 | 0.000 |
| <i>rseX</i> → / → <i>yedS</i> | 2,033,756 | G→T           | 0.174 | 0.000 | 0.000 | 0.160 |

**(b)**

| Gene                          | Annotation              |
|-------------------------------|-------------------------|
| <i>rpoB</i> →                 | R637P (CGT→CCT)         |
| <i>dctA</i> ← / ← <i>yhjK</i> | intergenic (-25/+158)   |
| <i>rpoB</i> →                 | S712F (TCC→TTC)         |
| <i>rpoB</i> →                 | S522Y (TCT→TAT)         |
| <i>yeaH</i> →                 | R177P (CGC→CCC)         |
| <i>yeaH</i> →                 | A249S (GCA→TCA)         |
| <i>cspC</i> ←                 | coding (125-129/210 nt) |
| <i>rseX</i> → / → <i>yedS</i> | intergenic (+17/-295)   |

**Table S5. (a) Position of minor polymorphisms (blue) in phage-resistant populations at day 35. (b) Annotation of genes mutated (blue- missense mutation; red- nucleotides changed) in phage-resistant populations at day 35.**

**(a)**

| Gene                          | Position  | Mutation      | Ph2   | Ph3   | Ph4   |
|-------------------------------|-----------|---------------|-------|-------|-------|
| <i>yejM</i> →                 | 2,285,463 | C→A           | 0.000 | 0.000 | 0.498 |
| <i>yejM</i> →                 | 2,285,814 | Δ10 bp        | 0.000 | 0.000 | 0.401 |
| <i>rscC</i> ←                 | 2,319,792 | IS2 (–) +5 bp | 0.000 | 0.479 | 0.000 |
| <i>rpoS</i> ←                 | 2,867,428 | C→A           | 0.183 | 0.000 | 0.000 |
| <i>rpoB</i> →                 | 4,184,810 | G→T           | 0.258 | 0.000 | 0.000 |
| <i>adiY</i> ← / ← <i>adiA</i> | 4,338,109 | C→A           | 0.210 | 0.000 | 0.000 |
| <i>hfq</i> →                  | 4,400,478 | C→T           | 0.000 | 0.000 | 0.401 |

**(b)**

| Gene                          | Annotation                                         |
|-------------------------------|----------------------------------------------------|
| <i>yejM</i> →                 | S363* (T <b>C</b> G→T <b>A</b> G)                  |
| <i>yejM</i> →                 | coding (1439-1448/1761 nt)                         |
| <i>rscC</i> ←                 | coding (81-85/2850 nt)                             |
| <i>rpoS</i> ←                 | E42* ( <b>G</b> A <b>A</b> → <b>T</b> A <b>A</b> ) |
| <i>rpoB</i> →                 | G1189V ( <b>G</b> <b>G</b> T→G <b>T</b> T)         |
| <i>adiY</i> ← / ← <i>adiA</i> | intergenic (-180/+145)                             |
| <i>hfq</i> →                  | P64L ( <b>C</b> <b>C</b> G→C <b>T</b> G)           |

**Stop codons are symbolized as \***
